# Supplementary material for: Deep learning-based image analysis methods for brightfield-acquired multiplex immunohistochemistry images
Source: Springer Nature journal article supplement (doi:10.1186/s13000-020-01003-0), 2020-07-28
Supplement: MOESM1 [file 18226274]

**Supplemental table 1. Automated staining parameters**

|                          | <b>Reagent</b>            | <b>Temperature</b> | <b>Time</b> |
|--------------------------|---------------------------|--------------------|-------------|
| <b>Baking</b>            |                           | 60                 | 20          |
| <b>Deparaffinization</b> |                           | 69                 | 8           |
|                          |                           | 69                 | 8           |
|                          |                           | 69                 | 8           |
|                          |                           | 69                 | 8           |
| <b>Antigen retrieval</b> | CC1 (high pH = 8)         | 95                 | 64          |
|                          | Inhibitor CM (H2O2)       |                    | 12          |
| <b>1</b>                 | <b>CD16 (SP175)</b>       | 37                 | 24          |
|                          | Anti-Rb HQ                | 37                 | 12          |
|                          | AntiHQ HRP                |                    | 12          |
|                          | DISC Ag C                 |                    | 16          |
| <b>2</b>                 | Denaturation (CC2 low pH) | 93                 | 8           |
|                          | <b>KDX K17</b>            | disable heat       | 60          |
|                          | Anti-Ms HQ                | 37                 | 20          |
|                          | Anti-HQ HRP               |                    | 20          |
|                          | ChromoMap DAB             |                    | 7           |
| <b>3</b>                 | Denaturation (CC2 low pH) | 93                 | 8           |
|                          | <b>Anti-CD8 (SP57)</b>    | disable heat       | 20          |
|                          | Anti-Rb HQ                | 37                 | 12          |
|                          | Anti-HQ HRP               |                    | 12          |
|                          | DISC H2O2                 |                    | 32          |
| <b>4</b>                 | Denaturation (CC2 low pH) | 93                 | 8           |
|                          | <b>Anti-CD3 (2GV6)</b>    | 37                 | 32          |
|                          | Anti-Rb NP                | 37                 | 20          |
|                          | Anti-NP AP                |                    | 20          |
|                          | DISCO Yellow              |                    | 32          |
| <b>5</b>                 | Denaturation (CC2 low pH) | 93                 | 8           |
|                          | <b>Anti-CD4 (SP35)</b>    | 37                 | 32          |
|                          | Anti-Rb HQ                | 37                 | 20          |
|                          | Anti-HQ HRP               |                    | 20          |
|                          | Teal HRP H2O2             |                    | 16          |
|                          | Teal HRP Act              |                    | 16          |
| <b>6</b>                 | Denaturation (CC2 low pH) | 93                 | 8           |
|                          | <b>Anti-CD20</b>          | 37                 | 20          |
|                          | Anti-Ms NP                | 37                 | 8           |
|                          | Amp Clear                 |                    | 8           |
|                          | Anti-NP AP                |                    | 8           |
|                          | DISC Red                  |                    | 8           |

| <b>Supplemental table 2. Multiplex IHC reagent information</b> |                                         |          |
|----------------------------------------------------------------|-----------------------------------------|----------|
| Category                                                       | Reagent                                 | Cat#     |
| Primary antibodies                                             | K17                                     |          |
|                                                                | CD3                                     | 790-4341 |
|                                                                | CD4                                     | 790-4423 |
|                                                                | CD8                                     | 790-4460 |
|                                                                | CD20                                    | 760-2531 |
|                                                                | CD16                                    | 760-4863 |
| Hapten-conjugated secondaries                                  | anti-ms HQ                              | 760-4814 |
|                                                                | anti-rb HQ                              | 760-4815 |
|                                                                | anti-ms NP                              | 760-4816 |
|                                                                | anti-rb NP                              | 760-4817 |
| Enzyme-conjugates                                              | anti-HQ HRP                             | 760-4820 |
|                                                                | anti-NP AP                              | 760-4827 |
| Chromogens                                                     | ChromoMap DAB                           | 760-159  |
|                                                                | Discovery Yellow                        | 760-239  |
|                                                                | Discovery Teal                          | 760-247  |
|                                                                | Discovery Purple                        | 760-229  |
|                                                                | Discovery Red                           | 760-228  |
|                                                                | Discovery Silver                        | 760-227  |
| Bulk reagents                                                  | Discovery Wash (10x.                    | 950-510  |
|                                                                | Liquid Coverslip (PREDILUTE.            | 650-010  |
|                                                                | Reaction Buffer (10x.                   | 950-300  |
|                                                                | DISCOVERY CC1 (PREDILUTE.               | 950-500  |
|                                                                | Cell Conditioning 2 (Predilute; pH = 6. | 950-123  |
|                                                                | Silver Wash II (PREDILUTE.              | 780-003  |
|                                                                | Amp Clear                               | 760-4841 |
|                                                                | Hematoxylin II                          | 790-2208 |
|                                                                | Bluing Reagent                          | 760-2037 |

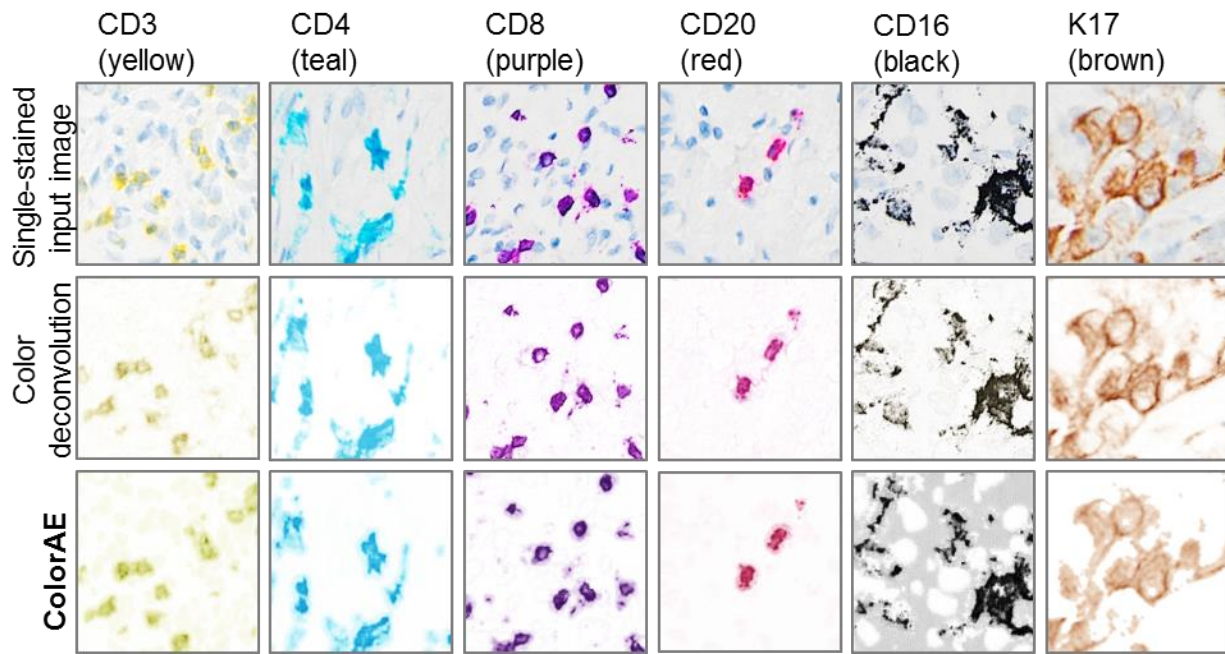

**Supplemental Figure 1. Performance of ColorAE compared to “ground truth” generated with traditional color decomposition.** We evaluated randomly extracted patches from single marker IHC WSIs for each cell class designated by a specific color. Traditional color decomposition was compared to ColorAE for all cell classes.

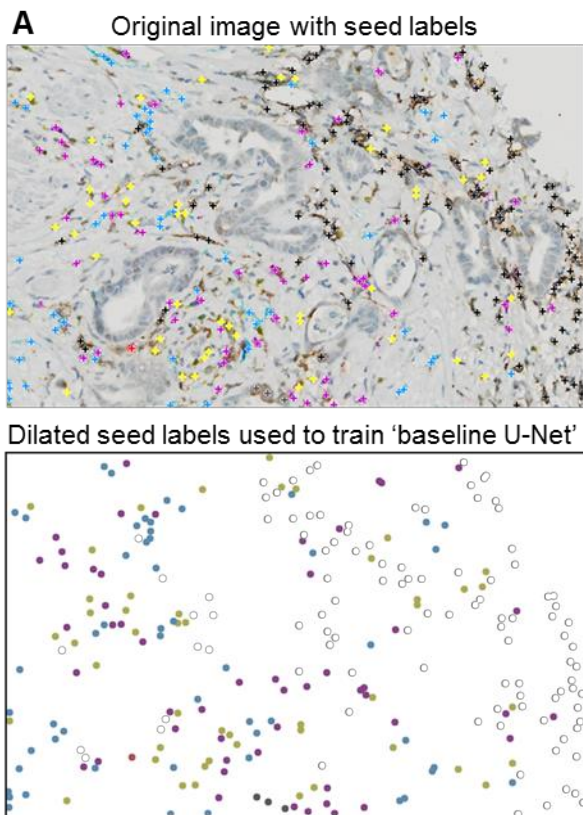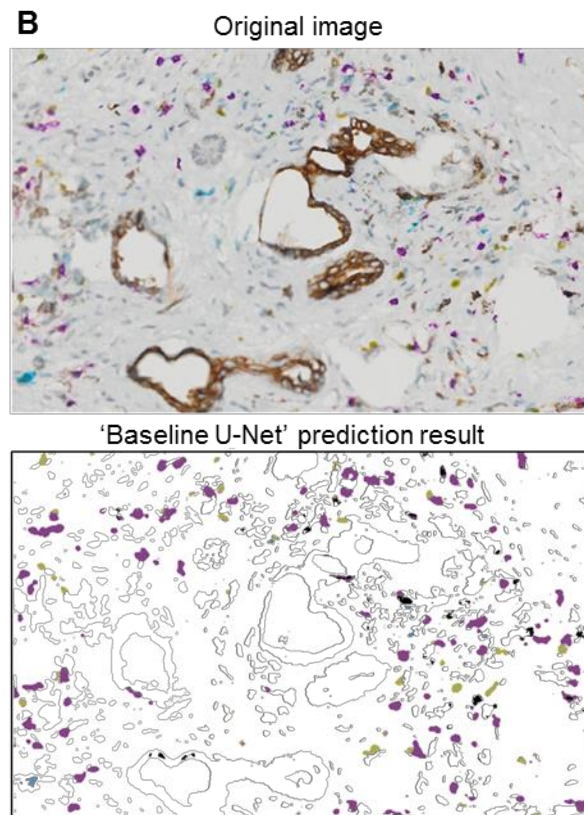

**Supplemental Figure 2. Baseline U-Net training and performance.** We evaluated the performance of the baseline U-NET model trained with conservatively expanded seed labels placed at the center of the cells. Since lymphocytes are circular to ovoid, this model can serve as a baseline model to evaluate the superpixel-trained U-Net model and ensemble methods. **A.** Image of a patch with seed labels overlaid (top) and the dilated seed labels generated for training the baseline 'U-NET' (bottom). **B.** Image of a patch (top) and predictions generated by the 'baseline U-NET' (bottom).

**Supplemental table 3.** Comparison of 'baseline' circle-trained UNET to both superpixel-trained UNET and ensemble method

|           | Model                   | CD3   | CD4   | CD8   | CD20  |
|-----------|-------------------------|-------|-------|-------|-------|
| F1        | circle-trained UNET     | 0.280 | 0.619 | 0.323 | 0.218 |
|           | superpixel-trained UNET | 0.628 | 0.661 | 0.628 | 0.353 |
|           | Union anchor AE         | 0.662 | 0.732 | 0.731 | 0.346 |
| Recall    | circle-trained UNET     | 0.972 | 0.65  | 0.974 | 0.216 |
|           | superpixel-trained UNET | 0.931 | 0.675 | 0.881 | 0.232 |
|           | Union anchor AE         | 0.974 | 0.795 | 0.872 | 0.212 |
| Precision | circle-trained UNET     | 0.171 | 0.669 | 0.201 | 0.62  |
|           | superpixel-trained UNET | 0.473 | 0.647 | 0.488 | 0.736 |
|           | Union anchor AE         | 0.501 | 0.678 | 0.629 | 0.944 |

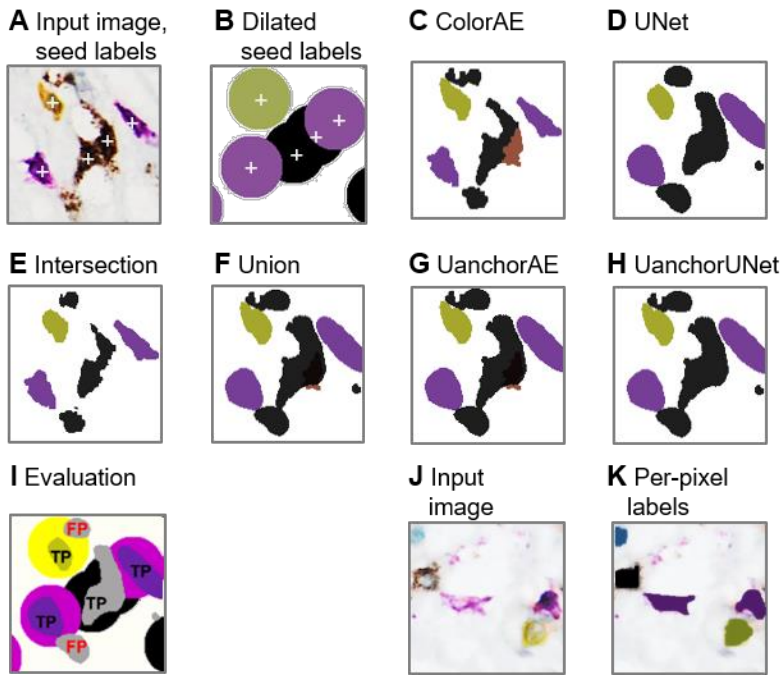

**Supplemental Figure 3. Results of model performance against ground truth. A-H. Ground truth as dilated seed labels:** **A.** Representative images of an input image with seed labels, **B.** the dilated seed labels used for evaluation, and **C-I.** the prediction masks generated by ColorAE, U-Net, and the ensemble methods: Intersection, Union, Union anchor ColorAE (UanchorAE), and Union anchor U-Net (UanchorUNet). **I.** Shows an example of how prediction masks were assessed; U-Net prediction masks are overlaid over dilated seed labels and labeled as true positive (TP, black) or false positive (FP, red). **J-K. Ground truth as hand-drawn per-pixel labels:** **J.** original input image. and **K.** per-pixel hand-drawn labels.

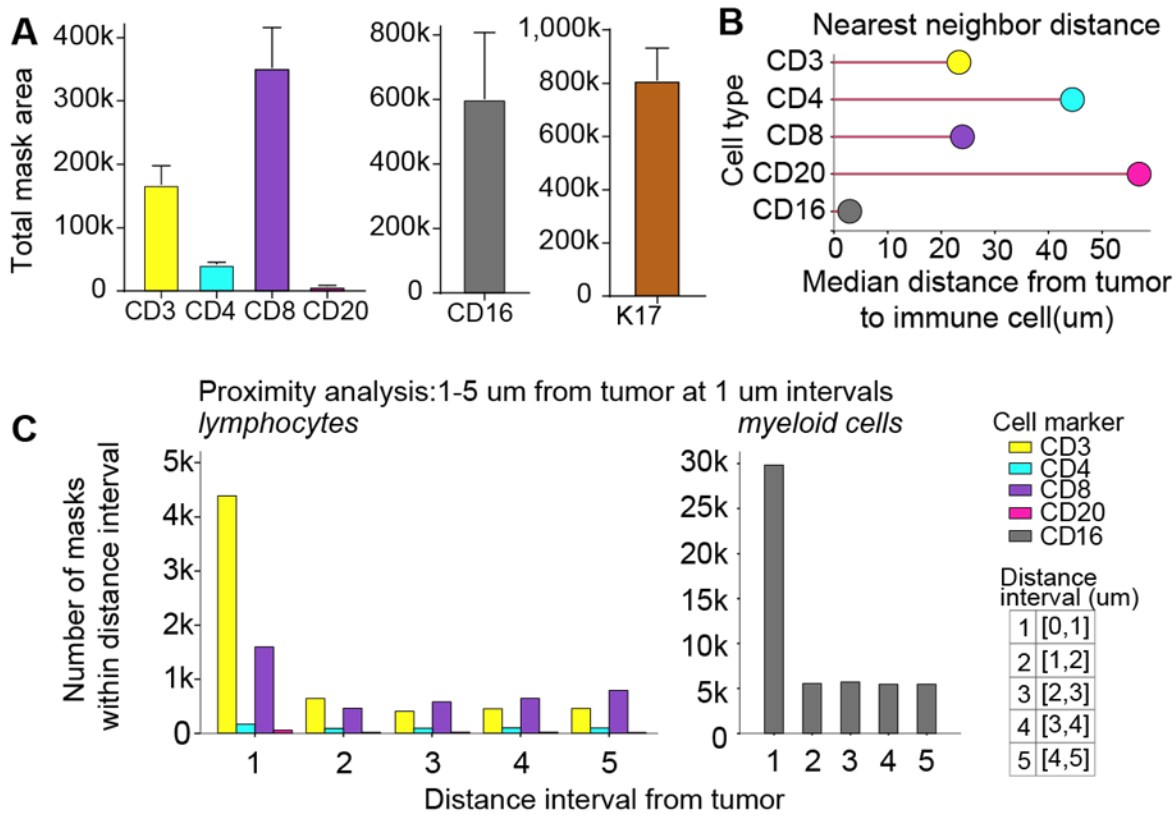

**Supplemental Figure 4. mIHC spatial analysis results.** **A.** Average total mask area (px) per case for each cell class across three WSIs. **B.** Median nearest neighbor distance from each tumor mask to the single closest immune cell of each cell class across the tumor region of three mIHC WSIs. Note this differs from results shown in Fig. 6, which counts the distance from every immune cell to the nearest tumor mask. **C.** Proximity analysis showing the number of masks for each cell class at 1  $\mu\text{m}$  distance intervals from the tumor boundary.
